# Supplementary material for: Photodegradation of clofibric acid in urban, town, and rural waters: important roles of dissolved organic matter composition
Source: Frontiers journal article supplement (doi:10.3389/fenvs.2024.1505162), 2024-11-05
Supplement: Supplementary_file_1.docx [file Supplementary_file_1.docx]

**Supplementary Information**

**Photodegradation of clofibric acid in urban, town, and rural waters: Important roles of dissolved organic matter composition**

**Jingting Chen1, Hairong Wen1, Chunlei Yu1, Yuxuan, Yin1, Yidi, Zhang1, Hongbin Wang1, Ying Huang1*, Kan Wang1***

1*School of Civil & Environmental Engineering and Geography Science, Ningbo University, Ningbo, 315211, Zhejiang, China*

*Corresponding author.

E-mail addresses: huangyingdhu@163.com (Y. Huang); [wangkan@nbu.edu.cn](mailto:wangkan@nbu.edu.cn) (K. Wang)

**Text S1** The detailed operational parameters of intermediates identification by GC-MS.

Samples were prepared by the solid phase extraction (SPE) method (with BOJIN® HLB SPE Column) and the silylation method (using chlorotrimethylsilane and pyridine hexamethyldisilazane). An HB-5 MS capillary column (30 m × 250 μm × 0.25 μm film thickness) equipped on the gas chromatograph. The column oven temperature was firstly held at 60 ℃ for 3 min, increased to 250 ℃ at 10 ℃∙min-1, then to 310 ℃ at a rate of 20 ℃∙min-1, and finally maintained for 13 min. Electron impact (EI) mode at 70 eV was used. The spectra were acquired in a scan range of 40-800 m/z. The intermediates analysis were verified from the NIST08 mass spectral library database.

**

**

**Figure S1** Effect of (A) HA, (B) FA and (C) Tyr concentrations on CA photolysis. Experimental conditions: [CA]0 = 0.1 mM, pH = 3.0, 500 W xenon lamp.





**Figure S2** Effect of combined DOM concentration on CA photolysis. Experimental conditions: [CA]0 = 0.1 mM, pH = 3.0. 500 W xenon lamp.





**Figure S3** The GC-MS spectrum of (A) phenol, (B) 4-chlorophenol, (C) 3-chlorophenol, (D) propanoic acid, 2-(4-chlorophenoxy)-2-methyl-, methyl ester.
